# Supplementary material for: Effect of grain boundary doping/segregation on the mechanical behavior of Ta bicrystal
Source: Royal Society of Chemistry journal article supplement (doi:10.1039/d4ce00603h), 2024-01-01
Supplement: d4ce00603h1.pdf [file d4ce00603h1.pdf]

## Supplementary Materials for

# Effect of Grain Boundary Doping/Segregation on the Mechanical Behavior of Ta Bicrystal

Yang Pan <sup>1</sup>, Tao Fu <sup>1,\*</sup>, Hao Hu <sup>1</sup>, Xingjie Chen <sup>2</sup>, Chuanying Li <sup>1</sup>, Shayuan Weng <sup>1,3,\*</sup>

<sup>1</sup> Department of Engineering Mechanics, Chongqing University, Chongqing 400044, China

<sup>2</sup> School of Aerospace, Xi'an Jiaotong University, Xi'an 710049, China

<sup>3</sup> College of Mechanical and Electrical Engineering, Hohai University, Changzhou 213022, China

### \*Corresponding authors.

Address: Department of Engineering Mechanics, Chongqing University, Chongqing 400044, China

E-mails: futao@cqu.edu.cn (T. Fu); syweng@hhu.edu.cn (S. Weng)

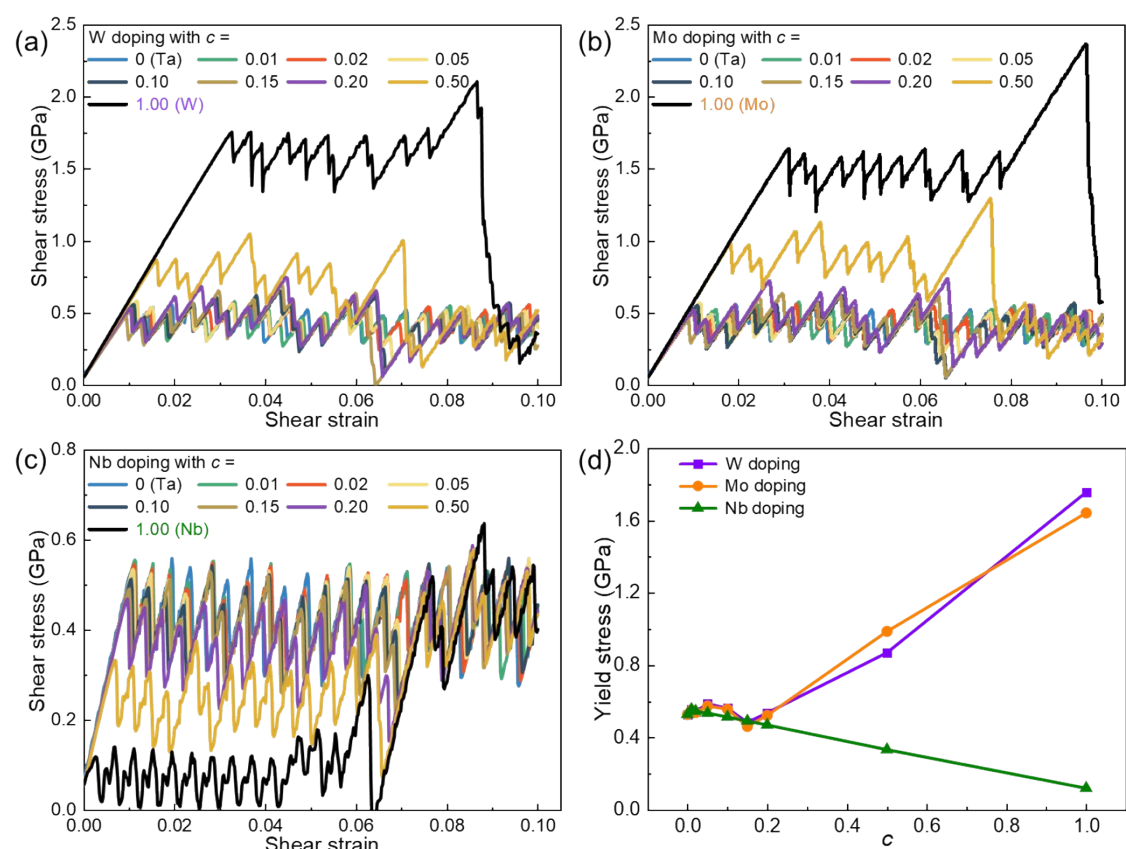

Fig. S1. Mechanical responses of Ta bicrystal containing  $\Sigma 3\{112\}\langle 110\rangle$  GBs doped with W, Mo, and Nb atoms under shear. (a)-(c) Shear stress-strain curves of samples doped with various concentrations of W, Mo, and Nb atoms. (d) Variation of yield stress with doping concentration.

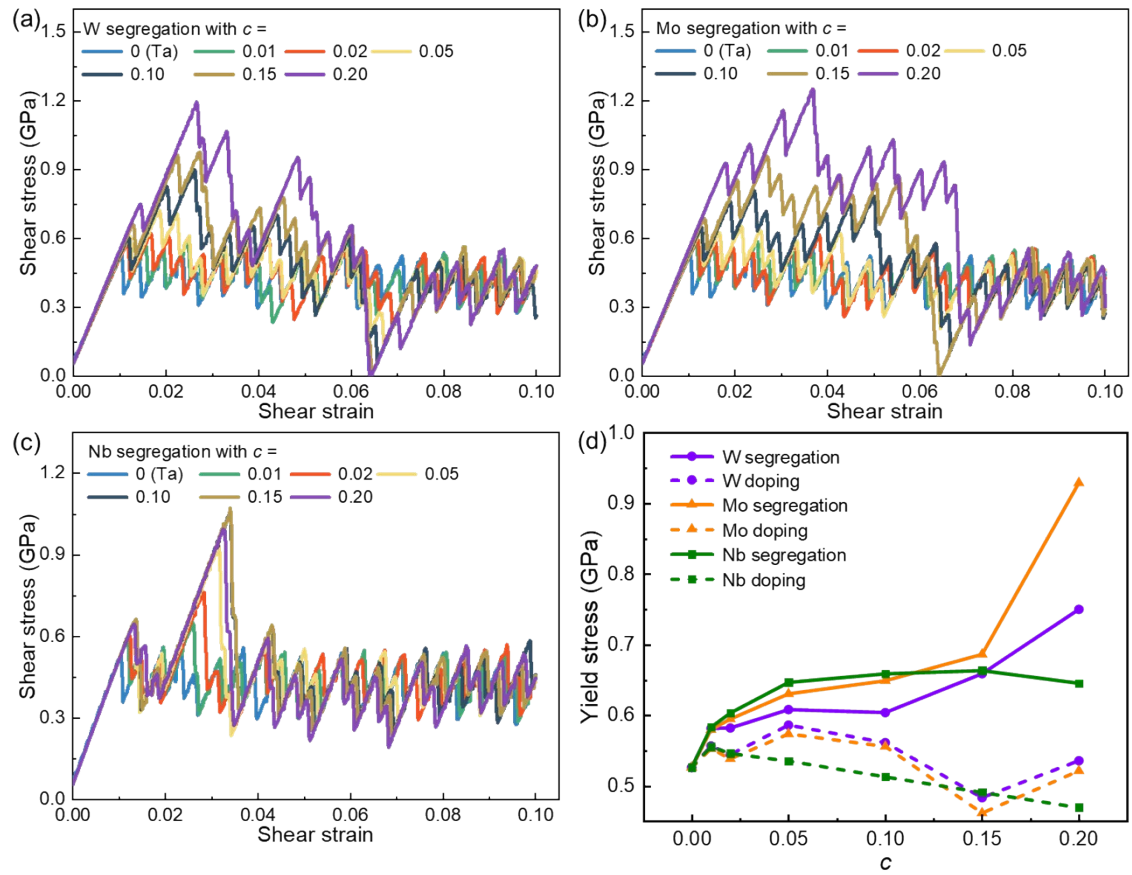

Fig. S2. Mechanical responses of Ta bicrystal sample containing  $\Sigma 3\{112\}\langle 110\rangle$  GBs with W, Mo, and Nb segregation under shear. (a)-(c) Stress-strain curves of samples with different segregation concentrations of W, Mo, and Nb. (d) Relationship between the yield stress and type/concentration of doping/segregation elements.
